# Supplementary material for: Ca-DEX biomineralization-inducing nuts reverse oxidative stress and bone loss in rheumatoid arthritis
Source: Royal Society of Chemistry journal article supplement (doi:10.1039/d3nr01324c), 2023-01-01
Supplement: d3nr01324c1.pdf [file d3nr01324c1.pdf]

## **Ca-DEX Biom mineralization-inducing Nuts Reverse Oxidative Stress and Bone Loss of Rheumatoid Arthritis**

*Yaqing Liu<sup>#a</sup>, Zongzhang Wang<sup>#a</sup>, Yiru Wang<sup>#a</sup>, Yushuo Feng<sup>\*a</sup>, Mengjiao Xu<sup>a</sup>,  
Xiaoqian Ma<sup>a</sup>, Qianqian Shi<sup>a</sup>, Huaping Deng<sup>a</sup>, Fangfang Ren<sup>a</sup>, Yong Chen<sup>\*b</sup>, Hongmin  
Chen<sup>\*a</sup>*

Y. Liu, Z. Wang, Y. Wang, Y. Feng, M. M. Xu, X. Ma, Q. Shi, H. Deng, F. Ren, Prof.

Y. Chen, Prof. H. Chen

- a. State Key Laboratory of Vaccines for Infectious Diseases, Xiang An Biomedicine Laboratory, State Key Laboratory of Molecular Vaccinology and Molecular Diagnostics & Center for Molecular Imaging and Translational Medicine, National Innovation Platform for Industry-Education Integration in Vaccine Research, School of Public Health, Xiamen University, Xiamen, China
- b. Department of Stomatology, School of Medicine, Xiamen University, Xiamen, China

# These authors made equal contributions to this work.

\* E-mail: hchen@xmu.edu.cn; yongchen@xmu.edu.cn; fys\_su@163.com

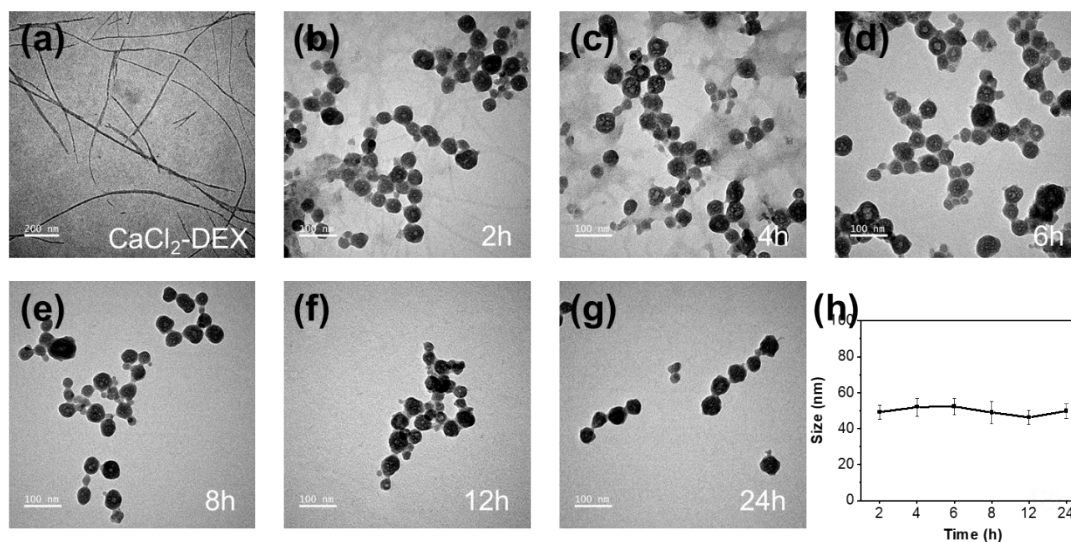

**Figure S1.** (a) Typical TEM image of CaCl<sub>2</sub>-DEX by the coordination of free DEX with Ca<sup>2+</sup> from CaCl<sub>2</sub> by stirring. (b-g) TEM images of CaCO<sub>3</sub>-DEX after reaction for 2~24 h. With the increase of reaction time, the structure of nanowires gradually disappears and the nanoparticles have better dispersion. (h) Size of the CaCO<sub>3</sub>-DEX based on the TEM images.

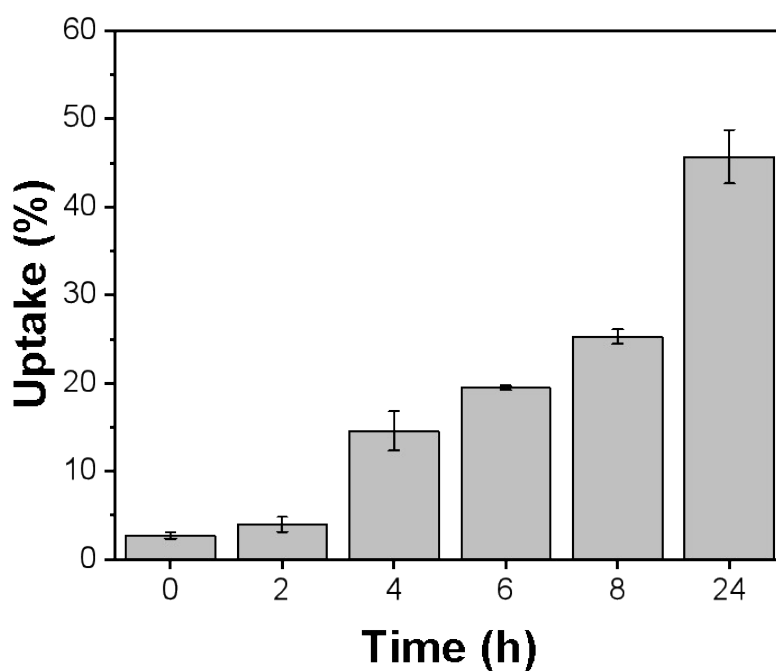

**Figure S2.** Quantitative analysis of cell uptake on Raw 264.7 cells incubated with CaCO<sub>3</sub>-DEX.

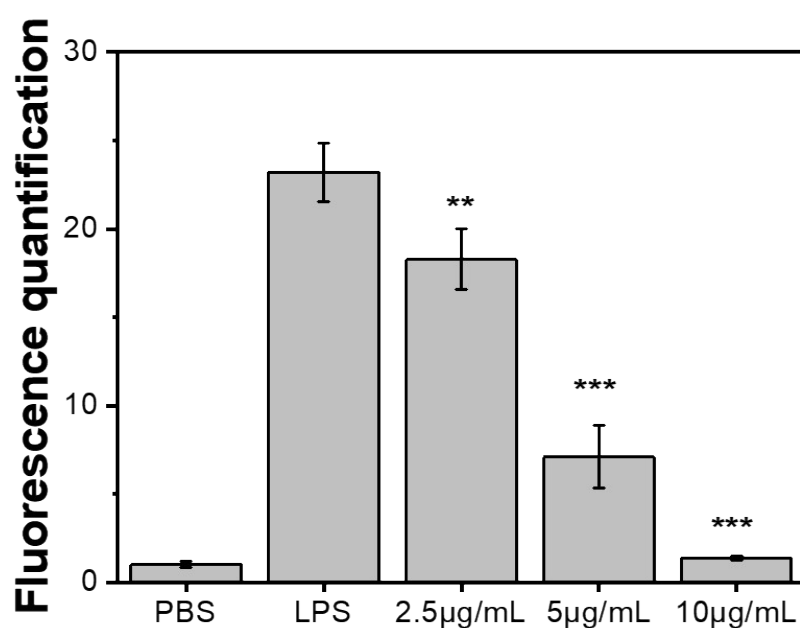

**Figure S3.** Quantitative analysis of ROS levels in different treatment groups. Statistical significance was calculated by One way ANOVA compared with LPS group (n = 3): \*p < 0.05, \*\* p < 0.01, \*\*\* p < 0.001.

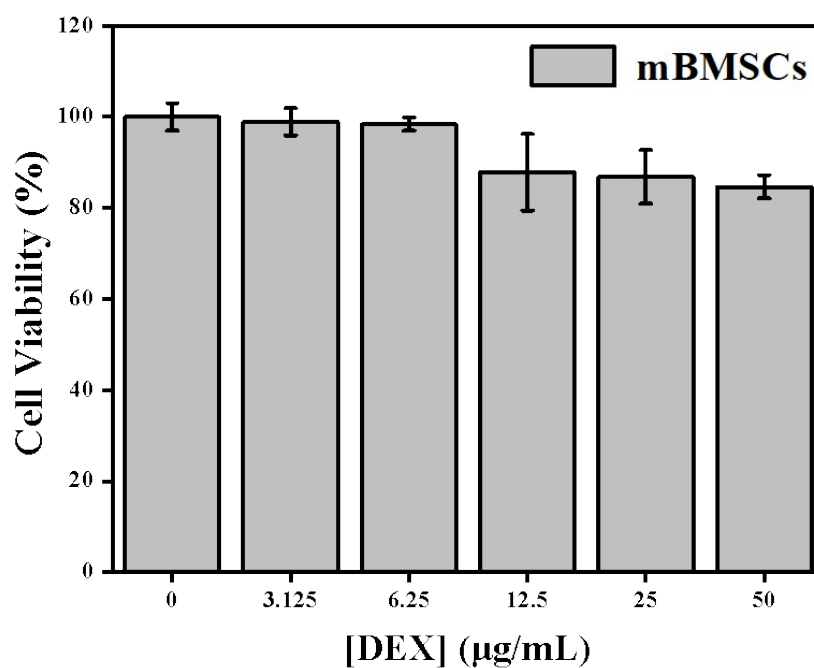

**Figure S4.** The cytocompatibility assessment of CaCO<sub>3</sub>-DEX on mBMSCs cells by MTT assay.

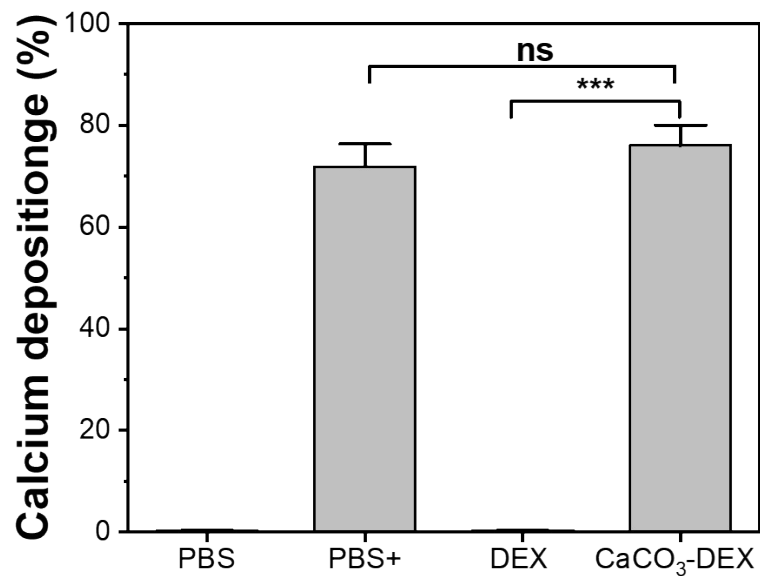

**Figure S5.** Quantitative analysis of the calcium deposition areas. Statistical significance was calculated by One way (n = 3): \*p < 0.05, \*\* p < 0.01, \*\*\* p < 0.001 and ns means no significant difference.

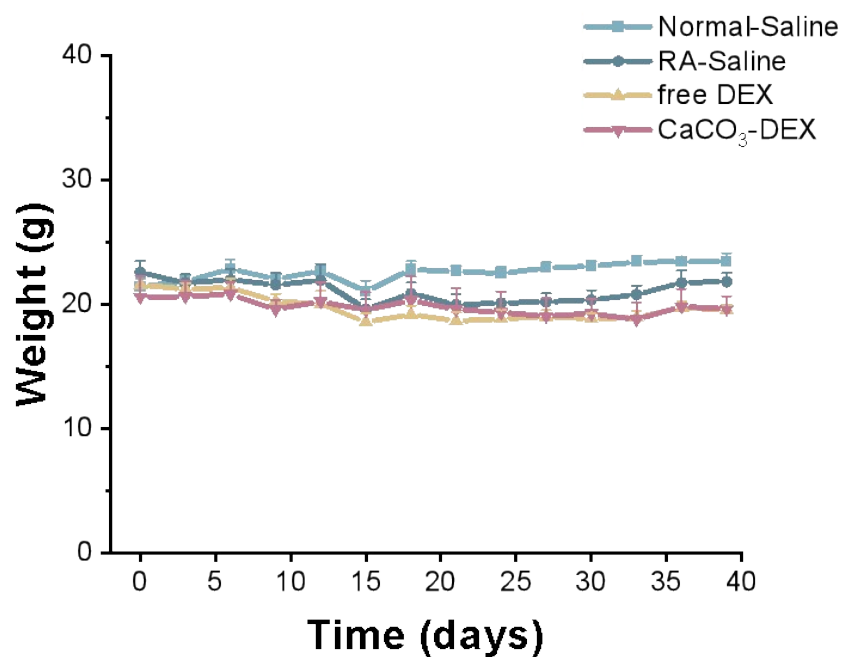

**Figure S6.** Weight of mice at various time points after different treatments.

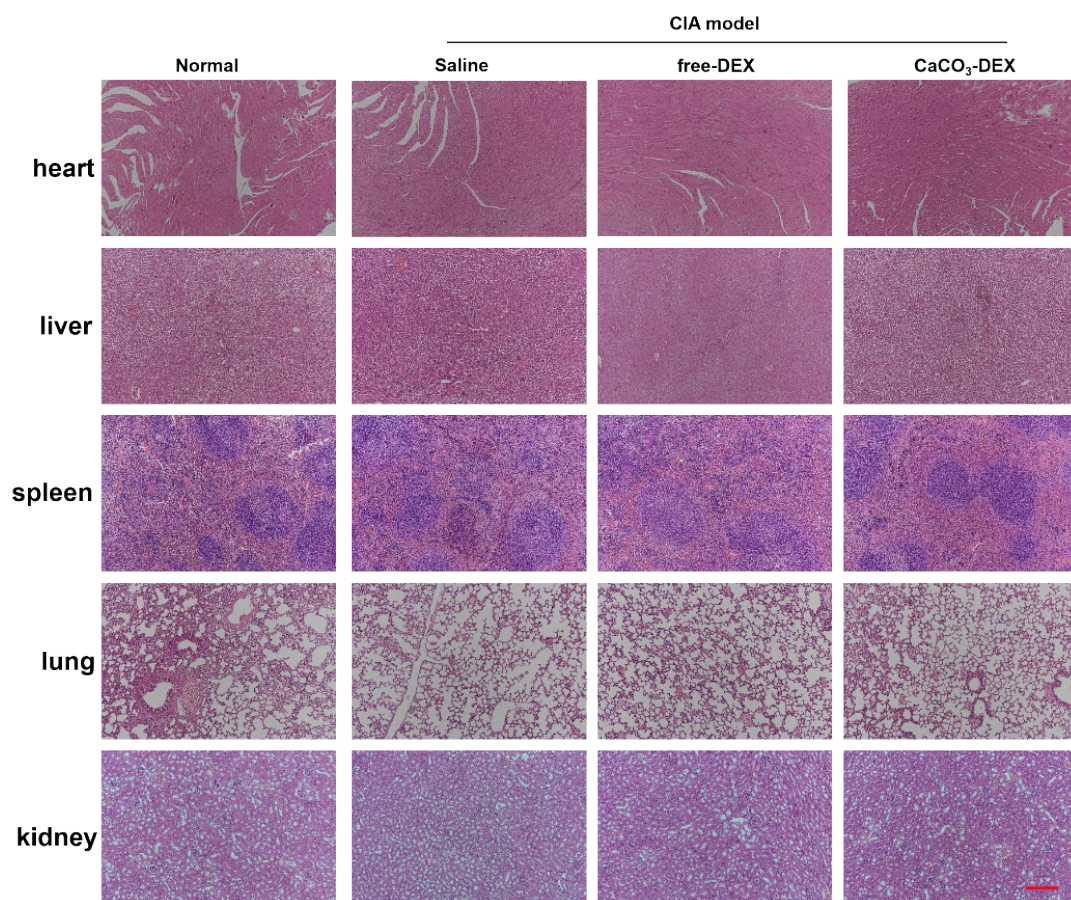

**Figure S7.** HE staining of the major organs (including heart, liver, spleen, lung, and kidney) of different groups. Scale bars: 200  $\mu$ m.

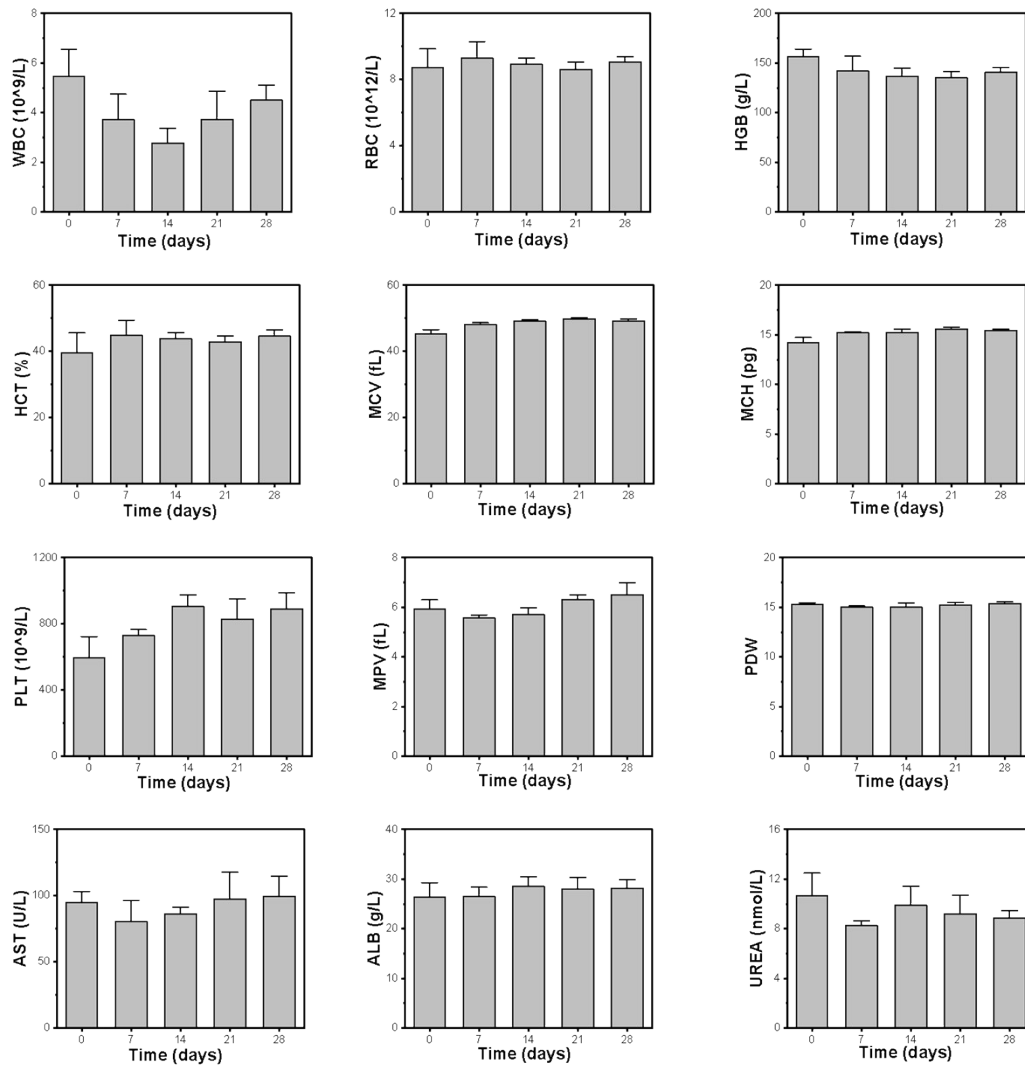

**Figure S8.** Hematological analysis and serum chemistry of mice treated with  $\text{CaCO}_3$ -DEX ([DEX]: 1mg/kg) on day 0, day 7, day14, day21 and day 28. Blood samples were collected on day 0, day 7, day14, day21 and day28. WBC, white blood cell; RBC, red blood cell; HGB, hemoglobin; HCT, red blood cell specific volume; MCV, mean corpuscular volume; MCH, mean corpuscular hemoglobin; PLT, platelets; MPV, mean platelet volume; PDW, platelet distribution width. AST, aspartate transaminase; ALB, albumin; UREA, blood urea nitrogen.
